# Supplementary material for: Injectable and topical local anesthetics for acute dental pain: 2 systematic reviews
Source: PubMed Central journal article supplement — J Am Dent Assoc. Author manuscript; Available in PMC 2024 Feb 16. (PMC10871026; doi:10.1016/j.adaj.2022.10.014), 2023-01
Supplement: NIHMS1965602-supplement-1.pdf [file NIHMS1965602-supplement-1.pdf]

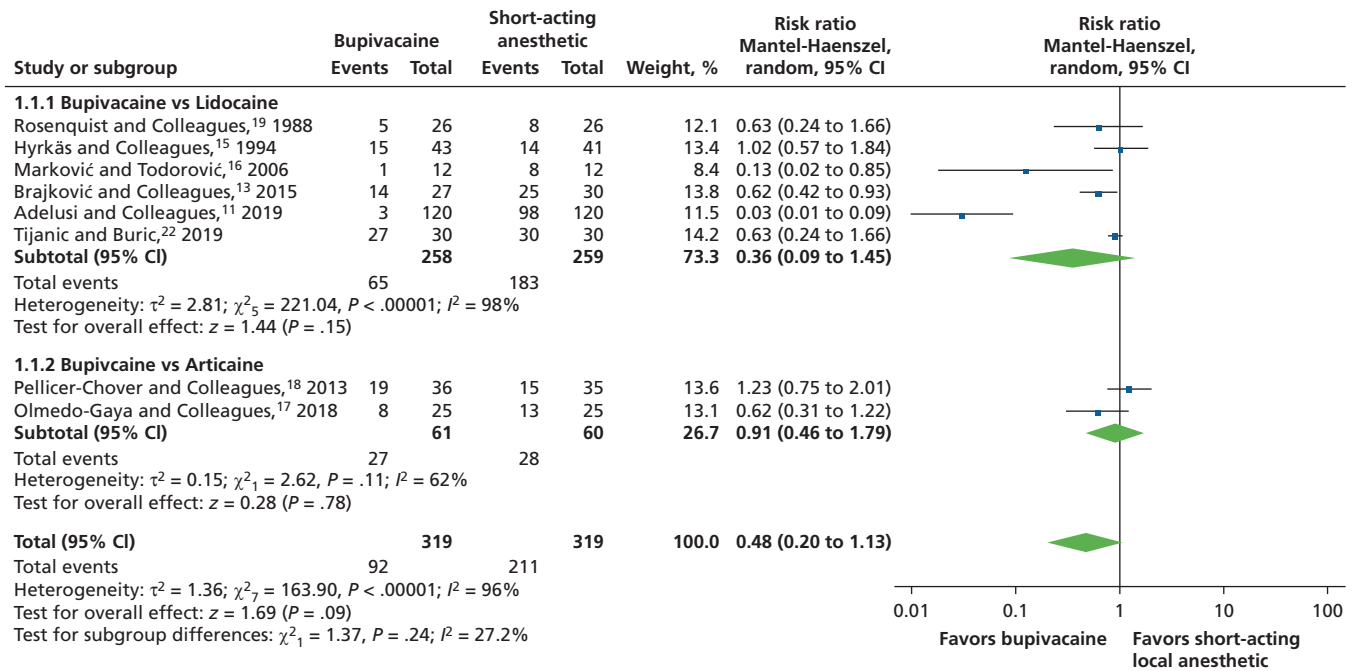

**eFigure 1.** Forest plot of bupivacaine vs short-acting local anesthetics for acute dental pain: use of rescue analgesia at longest follow-up.

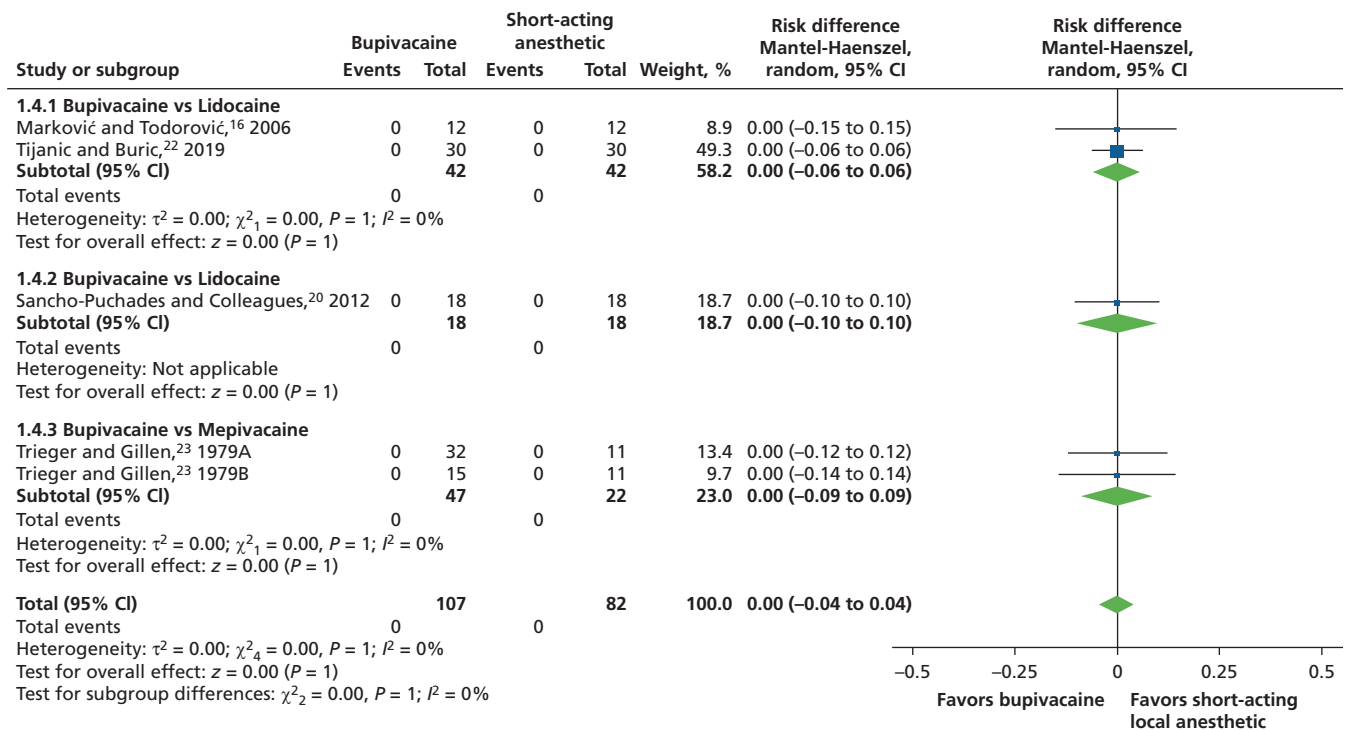

**eFigure 2.** Bupivacaine vs short-acting local anesthetics for acute dental pain: any adverse effect.  $P = 1$  is an artifact of the software system.

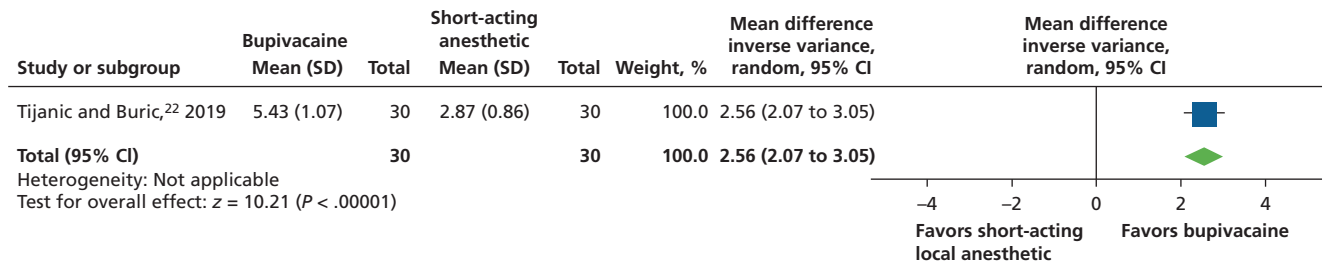

**eFigure 3.** Bupivacaine vs short-acting local anesthetic for acute dental pain: time (hours) to analgesic consumption.

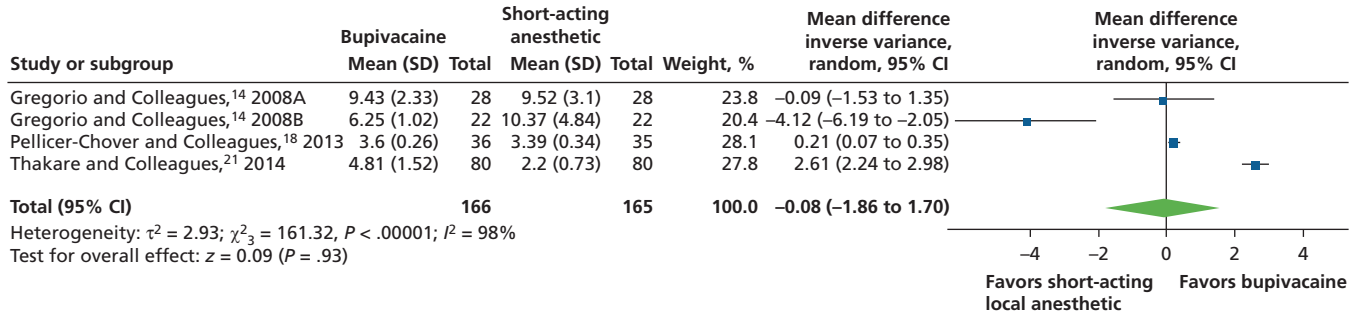

**eFigure 4.** Bupivacaine vs short-acting local anesthetic for acute dental pain: time (hours) to analgesic consumption.

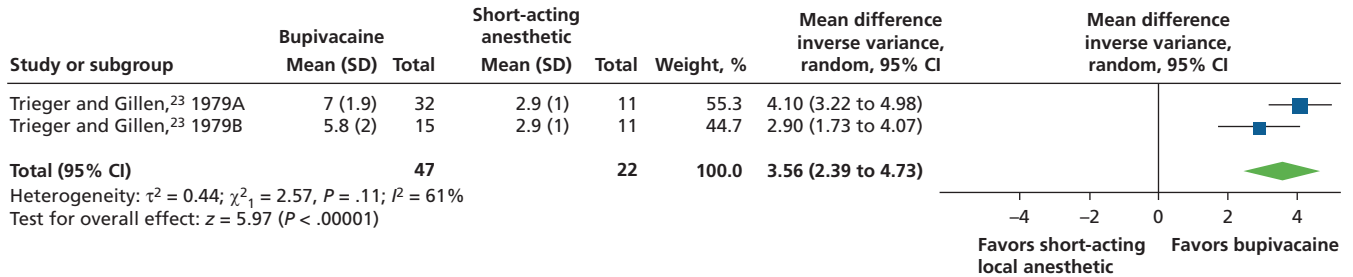

**eFigure 5.** Bupivacaine vs short-acting local anesthetic for acute dental pain: time (hours) to analgesic consumption.

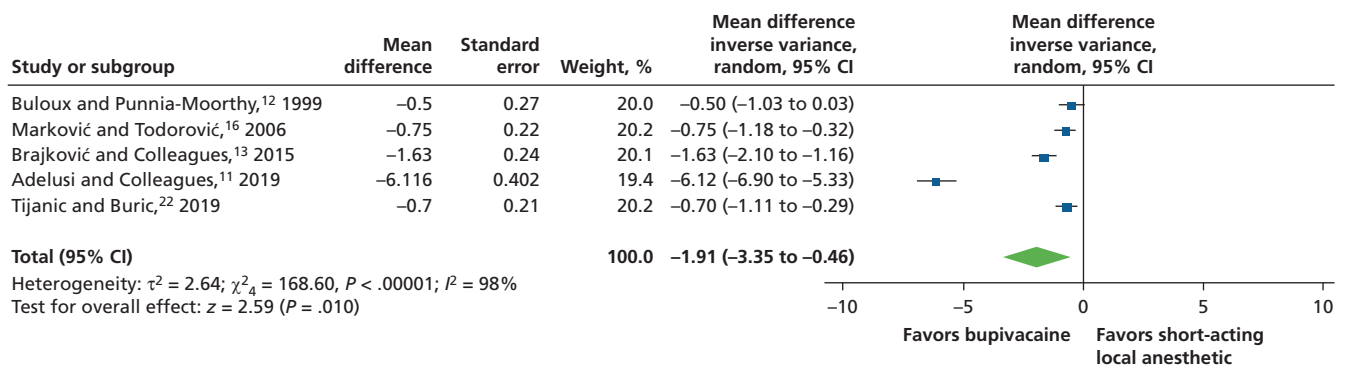

**eFigure 6.** Bupivacaine vs short-acting local anesthetic for acute dental pain: amount of analgesic consumption (doses).

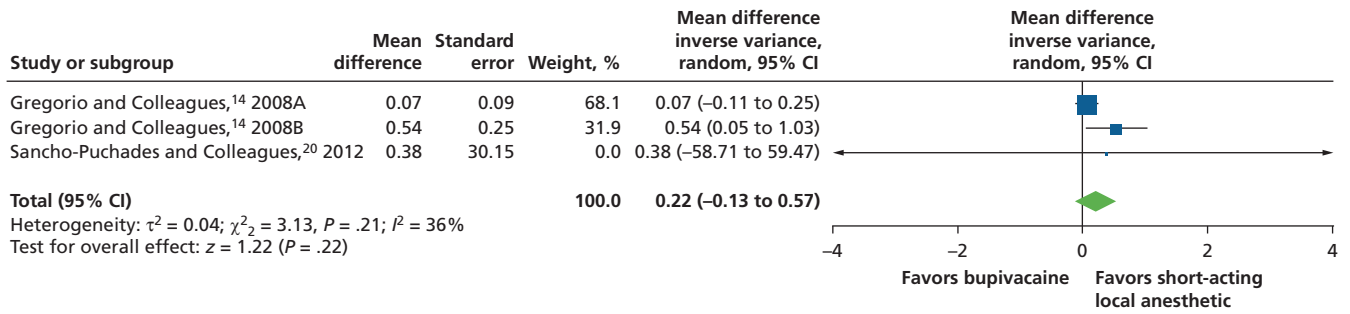

**eFigure 7.** Bupivacaine vs short-acting local anesthetic for acute dental pain: amount of analgesic consumption (doses).

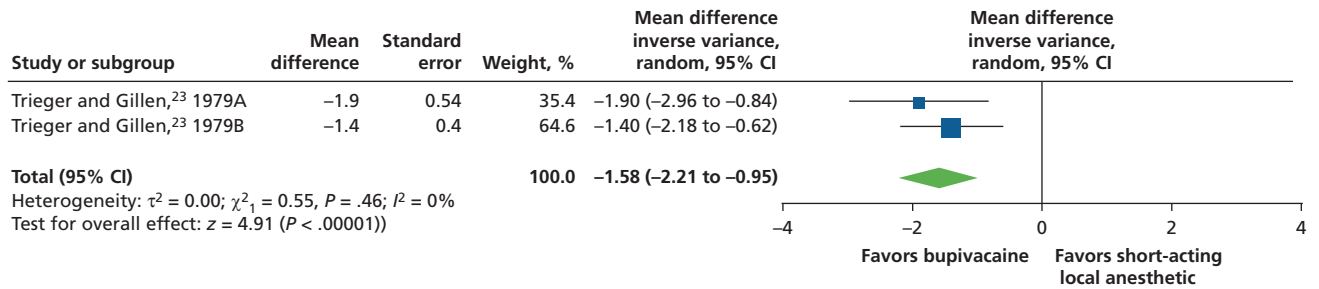

**eFigure 8.** Bupivacaine vs short-acting local anesthetic for acute dental pain: amount of analgesic consumption (doses).

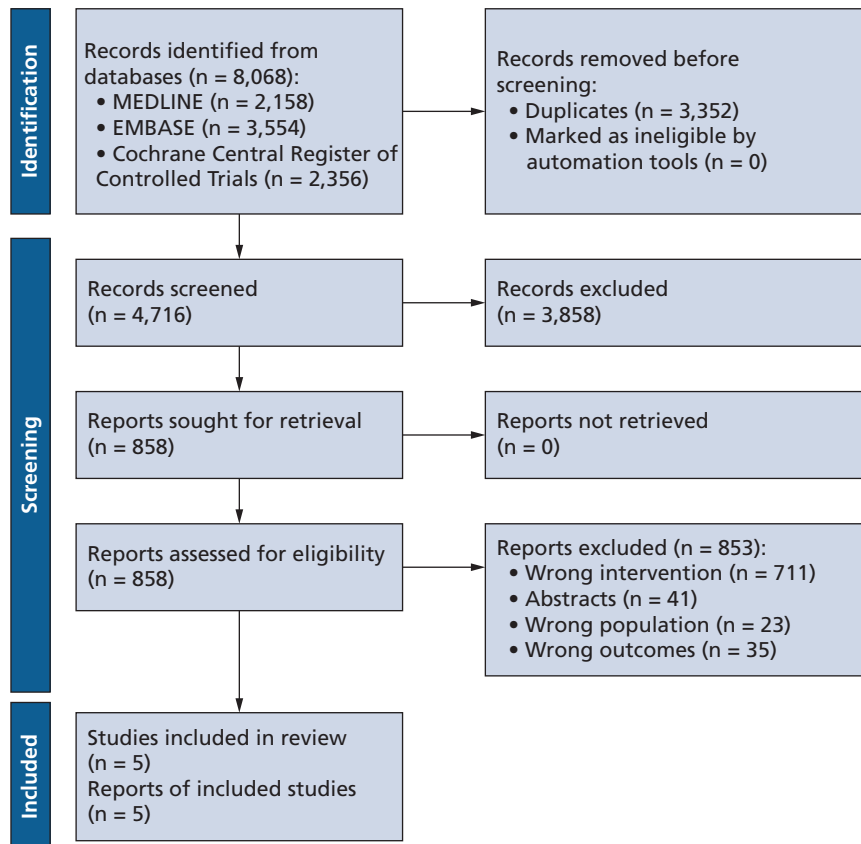

**eFigure 9.** Study identification and selection flowchart of the studies in systematic review 2 including benzocaine, following the Preferred Reporting Items for Systematic Reviews and Meta-Analyses 2020 statement.<sup>10</sup>

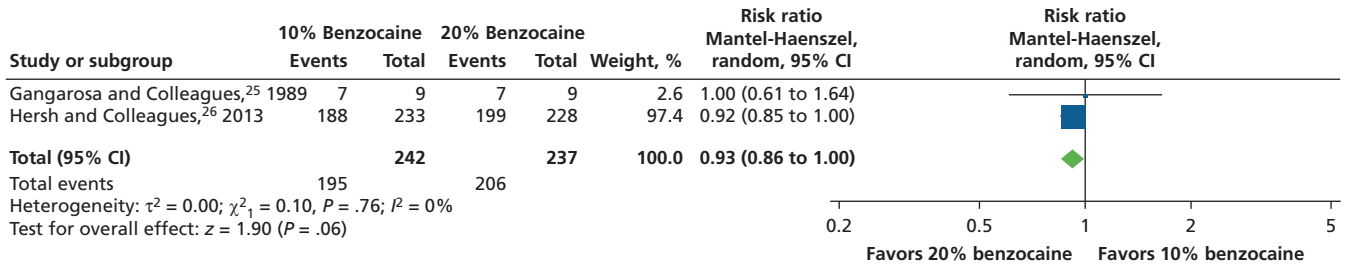

**eFigure 10.** 10% benzocaine vs 20% benzocaine: amount of responders at 20 minutes.

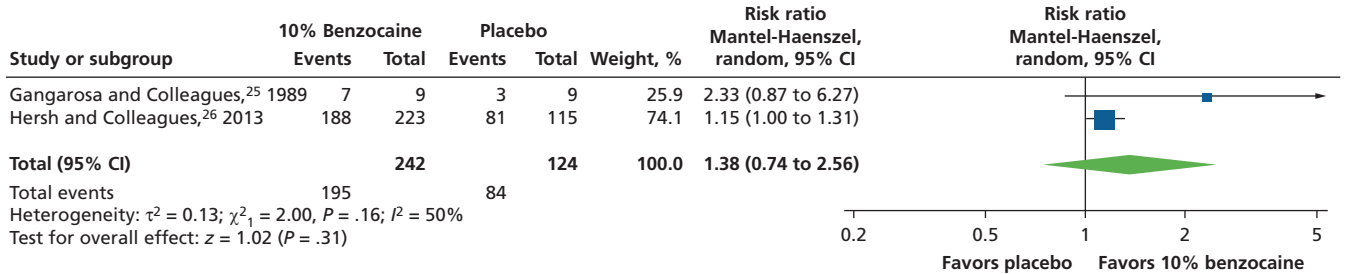

**eFigure 11.** 10% benzocaine vs placebo: amount of responders at 20 minutes.

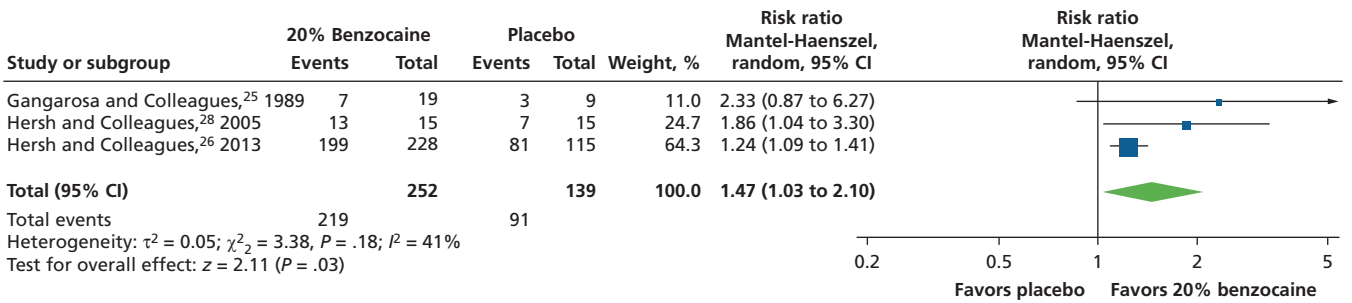

**eFigure 12.** 20% benzocaine vs placebo: amount of responders at 20 minutes.

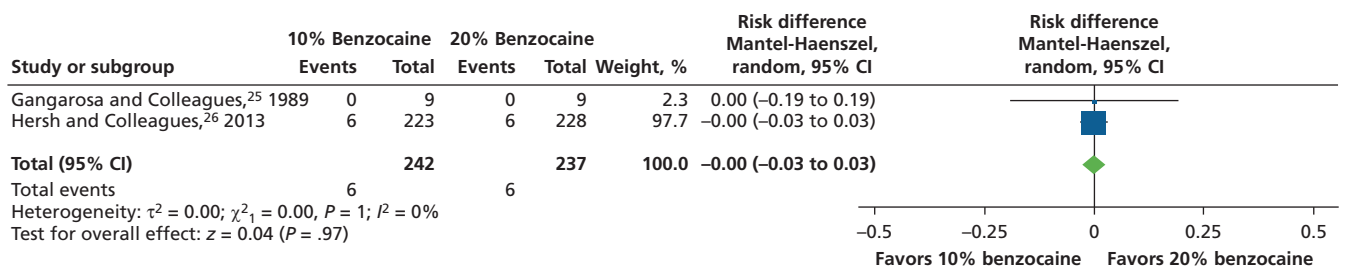

**eFigure 13.** 10% benzocaine vs 20% benzocaine: any adverse effect.  $P = 1$  is an artifact of the software system.

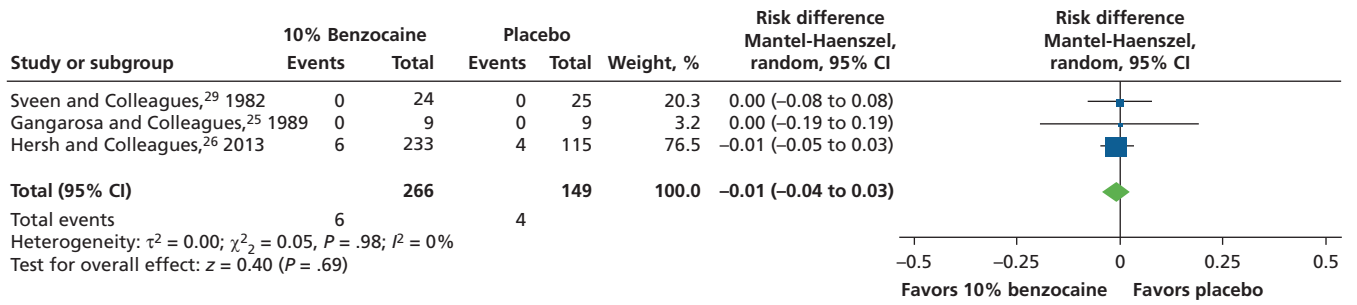

**eFigure 14.** 10% benzocaine vs placebo: any adverse effect.

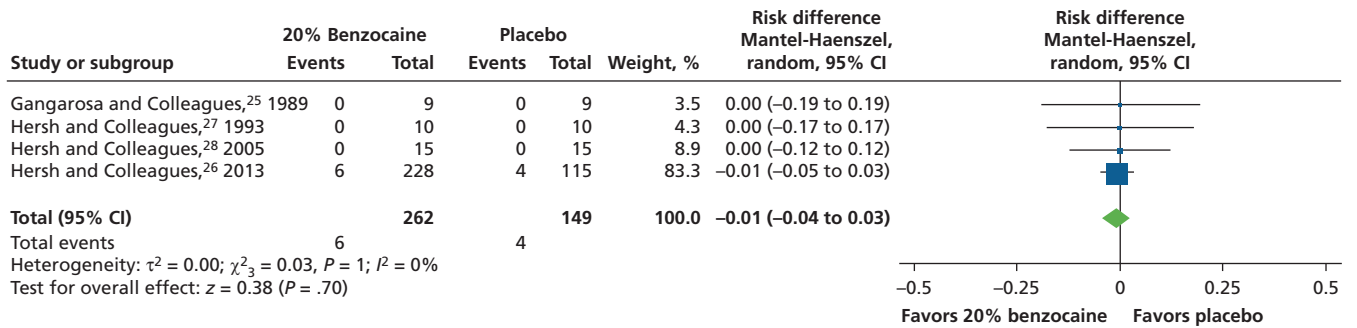

**eFigure 15.** 20% benzocaine vs placebo: any adverse effect.  $P = 1$  is an artifact of the software system.

**eTable 1.** PRISMA\* checklist.

| SECTION AND TOPIC             | ITEM NO. | CHECKLIST ITEM                                                                                                                                                                                                                                                                                       | LOCATION WHERE ITEM IS REPORTED |
|-------------------------------|----------|------------------------------------------------------------------------------------------------------------------------------------------------------------------------------------------------------------------------------------------------------------------------------------------------------|---------------------------------|
| <b>Title</b>                  |          |                                                                                                                                                                                                                                                                                                      |                                 |
| Title                         | 1        | Identify the report as a systematic review.                                                                                                                                                                                                                                                          | Page (P) 1                      |
| <b>Abstract</b>               |          |                                                                                                                                                                                                                                                                                                      |                                 |
| Abstract                      | 2        | See the PRISMA 2020 for abstracts checklist.                                                                                                                                                                                                                                                         | P1                              |
| <b>Introduction</b>           |          |                                                                                                                                                                                                                                                                                                      |                                 |
| Rationale                     | 3        | Describe the rationale for the review in the context of existing knowledge.                                                                                                                                                                                                                          | P3                              |
| Objectives                    | 4        | Provide an explicit statement of the objective(s) or question(s) the review addresses.                                                                                                                                                                                                               | P3                              |
| <b>Methods</b>                |          |                                                                                                                                                                                                                                                                                                      |                                 |
| Eligibility criteria          | 5        | Specify the inclusion and exclusion criteria for the review and how studies were grouped for the syntheses.                                                                                                                                                                                          | P3-4                            |
| Information sources           | 6        | Specify all databases, registers, websites, organisations, reference lists and other sources searched or consulted to identify studies. Specify the date when each source was last searched or consulted.                                                                                            | P4, appendix                    |
| Search strategy               | 7        | Present the full search strategies for all databases, registers, and websites, including any filters and limits used.                                                                                                                                                                                | Appendix                        |
| Selection process             | 8        | Specify the methods used to decide whether a study met the inclusion criteria of the review, including how many reviewers screened each record and each report retrieved, whether they worked independently, and if applicable, details of automation tools used in the process.                     | P4                              |
| Data collection process       | 9        | Specify the methods used to collect data from reports, including how many reviewers collected data from each report, whether they worked independently, any processes for obtaining or confirming data from study investigators, and if applicable, details of automation tools used in the process. | P4                              |
| Data items                    | 10a      | List and define all outcomes for which data were sought. Specify whether all results that were compatible with each outcome domain in each study were sought (for example, for all measures, time points, analyses), and if not, the methods used to decide which results to collect.                | P4                              |
|                               | 10b      | List and define all other variables for which data were sought (for example, participant and intervention characteristics, funding sources). Describe any assumptions made about any missing or unclear information.                                                                                 | P4                              |
| Study risk of bias assessment | 11       | Specify the methods used to assess risk of bias in the included studies, including details of the tool(s) used, how many reviewers assessed each study and whether they worked independently, and if applicable, details of automation tools used in the process.                                    | P5                              |
| Effect measures               | 12       | Specify for each outcome the effect measure(s) (for example, risk ratio, mean difference) used in the synthesis or presentation of results.                                                                                                                                                          | P5                              |
| Synthesis methods             | 13a      | Describe the processes used to decide which studies were eligible for each synthesis (for example, tabulating the study intervention characteristics and comparing against the planned groups for each synthesis [item no. 5]).                                                                      | P5                              |
|                               | 13b      | Describe any methods required to prepare the data for presentation or synthesis, such as handling of missing summary statistics, or data conversions.                                                                                                                                                | P5                              |
|                               | 13c      | Describe any methods used to tabulate or visually display results of individual studies and syntheses.                                                                                                                                                                                               | P5                              |
|                               | 13d      | Describe any methods used to synthesize results and provide a rationale for the choice(s). If meta-analysis was performed, describe the model(s), method(s) to identify the presence and extent of statistical heterogeneity, and software package(s) used.                                          | P5                              |
|                               | 13e      | Describe any methods used to explore possible causes of heterogeneity among study results (for example, subgroup analysis, meta-regression).                                                                                                                                                         | P6                              |
|                               | 13f      | Describe any sensitivity analyses conducted to assess robustness of the synthesized results.                                                                                                                                                                                                         | P6                              |

\* PRISMA: Preferred Reporting Items for Systematic Reviews and Meta-Analyses.<sup>10</sup>

eTable 1. Continued

| SECTION AND TOPIC                               | ITEM NO. | CHECKLIST ITEM                                                                                                                                                                                                                                                                               | LOCATION WHERE ITEM IS REPORTED |
|-------------------------------------------------|----------|----------------------------------------------------------------------------------------------------------------------------------------------------------------------------------------------------------------------------------------------------------------------------------------------|---------------------------------|
| Reporting bias assessment                       | 14       | Describe any methods used to assess risk of bias due to missing results in a synthesis (arising from reporting biases).                                                                                                                                                                      | Not applicable                  |
| Certainty assessment                            | 15       | Describe any methods used to assess certainty (or confidence) in the body of evidence for an outcome.                                                                                                                                                                                        | P6                              |
| <b>Results</b>                                  |          |                                                                                                                                                                                                                                                                                              |                                 |
| Study selection                                 | 16a      | Describe the results of the search and selection process, from the number of records identified in the search to the number of studies included in the review, ideally using a flow diagram.                                                                                                 | P7                              |
|                                                 | 16b      | Cite studies that might appear to meet the inclusion criteria, but which were excluded, and explain why they were excluded.                                                                                                                                                                  | Not applicable                  |
| Study characteristics                           | 17       | Cite each included study and present its characteristics.                                                                                                                                                                                                                                    | P7                              |
| Risk of bias in studies                         | 18       | Present assessments of risk of bias for each included study.                                                                                                                                                                                                                                 | Appendix                        |
| Results of individual studies                   | 19       | For all outcomes, present, for each study: (a) summary statistics for each group (where appropriate) and (b) an effect estimate and its precision (for example, confidence/credible interval), ideally using structured tables or plots.                                                     | Not applicable                  |
| Results of syntheses                            | 20a      | For each synthesis, briefly summarise the characteristics and risk of bias among contributing studies.                                                                                                                                                                                       | P7                              |
|                                                 | 20b      | Present results of all statistical syntheses conducted. If meta-analysis was done, present for each the summary estimate and its precision (for example, confidence/credible interval) and measures of statistical heterogeneity. If comparing groups, describe the direction of the effect. | P7-11                           |
|                                                 | 20c      | Present results of all investigations of possible causes of heterogeneity among study results.                                                                                                                                                                                               | Appendix                        |
|                                                 | 20d      | Present results of all sensitivity analyses conducted to assess the robustness of the synthesized results.                                                                                                                                                                                   | Appendix                        |
| Reporting biases                                | 21       | Present assessments of risk of bias due to missing results (arising from reporting biases) for each synthesis assessed.                                                                                                                                                                      | Appendix                        |
| Certainty of evidence                           | 22       | Present assessments of certainty (or confidence) in the body of evidence for each outcome assessed.                                                                                                                                                                                          | Appendix                        |
| <b>Discussion</b>                               |          |                                                                                                                                                                                                                                                                                              |                                 |
| Discussion                                      | 23a      | Provide a general interpretation of the results in the context of other evidence.                                                                                                                                                                                                            | P11-12                          |
|                                                 | 23b      | Discuss any limitations of the evidence included in the review.                                                                                                                                                                                                                              | P12                             |
|                                                 | 23c      | Discuss any limitations of the review processes used.                                                                                                                                                                                                                                        | P13                             |
|                                                 | 23d      | Discuss implications of the results for practice, policy, and future research.                                                                                                                                                                                                               | P12                             |
| <b>Other Information</b>                        |          |                                                                                                                                                                                                                                                                                              |                                 |
| Registration and protocol                       | 24a      | Provide registration information for the review, including register name and registration number, or state that the review was not registered.                                                                                                                                               | P3                              |
|                                                 | 24b      | Indicate where the review protocol can be accessed, or state that a protocol was not prepared.                                                                                                                                                                                               | Not applicable                  |
|                                                 | 24c      | Describe and explain any amendments to information provided at registration or in the protocol.                                                                                                                                                                                              | Not applicable                  |
| Support                                         | 25       | Describe sources of financial or non-financial support for the review, and the role of the funders or sponsors in the review.                                                                                                                                                                | P1                              |
| Competing interests                             | 26       | Declare any competing interests of review authors.                                                                                                                                                                                                                                           | P1                              |
| Availability of data, code, and other materials | 27       | Report which of the following are publicly available and where they can be found: template data collection forms; data extracted from included studies; data used for all analyses; analytic code; any other materials used in the review.                                                   | Not applicable                  |

**eTable 2.** Sample search strategy.

| DATABASE                                                                                                                                   | SEARCH STRATEGY                                                                                                                                                                                                                                                                                                                                                                  |
|--------------------------------------------------------------------------------------------------------------------------------------------|----------------------------------------------------------------------------------------------------------------------------------------------------------------------------------------------------------------------------------------------------------------------------------------------------------------------------------------------------------------------------------|
| Ovid MEDLINE E-published Ahead of Print, In-Process, and Other Non-Indexed Citations, Ovid MEDLINE Daily, and Ovid MEDLINE 1946 to Present | 1 (pain* and (dental or teeth or tooth or oral or mouth or odont* or endodont*)).mp. [mp=title, abstract, original title, name of substance word, subject heading word, floating sub-heading word, keyword heading word, organism supplementary concept word, protocol supplementary concept word, rare disease supplementary concept word, unique identifier, synonyms] (58334) |
|                                                                                                                                            | 2 (pain/ or acute pain/ or exp pain, postoperative/) and (dental or teeth or tooth or oral or mouth or odont* or endodont*).ti,ab. (11066)                                                                                                                                                                                                                                       |
|                                                                                                                                            | 3 1 or 2 (58338)                                                                                                                                                                                                                                                                                                                                                                 |
|                                                                                                                                            | Annotation: dental pain limiter                                                                                                                                                                                                                                                                                                                                                  |
|                                                                                                                                            | 4 Toothache/ or Pulpitis/ or exp periapical periodontitis/ (10036)                                                                                                                                                                                                                                                                                                               |
|                                                                                                                                            | 5 (toothache* or odontalg* or pulpitis or apical periodontitis or periapical abscess or endodont*).mp. (30122)                                                                                                                                                                                                                                                                   |
|                                                                                                                                            | 6 4 or 5 (31297)                                                                                                                                                                                                                                                                                                                                                                 |
|                                                                                                                                            | Annotation: endodontic population                                                                                                                                                                                                                                                                                                                                                |
|                                                                                                                                            | 7 3 and 6 (3406)                                                                                                                                                                                                                                                                                                                                                                 |
|                                                                                                                                            | Annotation: endodontic dental pain                                                                                                                                                                                                                                                                                                                                               |
|                                                                                                                                            | 8 Molar, Third/ (6670)                                                                                                                                                                                                                                                                                                                                                           |
|                                                                                                                                            | 9 exp Tooth Extraction/ (20340)                                                                                                                                                                                                                                                                                                                                                  |
|                                                                                                                                            | 10 (((third or wisdom or impact* or unerupt*) adj3 (teeth or tooth or molar)) or ((teeth or tooth or molar) adj3 (extract* or remov* or surg*))).mp. (44553)                                                                                                                                                                                                                     |
|                                                                                                                                            | 11 or/8-10 (45201)                                                                                                                                                                                                                                                                                                                                                               |
|                                                                                                                                            | Annotation: third molar extraction                                                                                                                                                                                                                                                                                                                                               |
|                                                                                                                                            | 12 3 and 11 (3905)                                                                                                                                                                                                                                                                                                                                                               |
|                                                                                                                                            | Annotation: third molar extraction pain                                                                                                                                                                                                                                                                                                                                          |
|                                                                                                                                            | 13 7 or 12 (6947)                                                                                                                                                                                                                                                                                                                                                                |
|                                                                                                                                            | 14 3 and (6 or 11) (6947)                                                                                                                                                                                                                                                                                                                                                        |
|                                                                                                                                            | Annotation: logic check: dental pain and (endodontic or third molar)                                                                                                                                                                                                                                                                                                             |
|                                                                                                                                            | 15 random:.tw. or placebo:.mp. or double-blind:.tw. (1291591)                                                                                                                                                                                                                                                                                                                    |
|                                                                                                                                            | 16 ((treatment or control) adj3 group*).ab. (624172)                                                                                                                                                                                                                                                                                                                             |
|                                                                                                                                            | 17 (allocat* adj5 group*).ab. (26592)                                                                                                                                                                                                                                                                                                                                            |
|                                                                                                                                            | 18 ((clinical or control*) adj3 trial).ti,ab,kw. (297366)                                                                                                                                                                                                                                                                                                                        |
|                                                                                                                                            | 19 or/15-18 (1798368)                                                                                                                                                                                                                                                                                                                                                            |
|                                                                                                                                            | Annotation: modified HIRU RCT filter                                                                                                                                                                                                                                                                                                                                             |
|                                                                                                                                            | 20 14 and 19 (2275)                                                                                                                                                                                                                                                                                                                                                              |
|                                                                                                                                            | 21 exp animals/ not humans.sh. (4768153)                                                                                                                                                                                                                                                                                                                                         |
|                                                                                                                                            | 22 20 not 21 (2258)                                                                                                                                                                                                                                                                                                                                                              |
|                                                                                                                                            | 23 (dh or dt or pc or rh or rt or su or th).fs. (7033700)                                                                                                                                                                                                                                                                                                                        |
|                                                                                                                                            | 24 exp Analgesia/ (44555)                                                                                                                                                                                                                                                                                                                                                        |
|                                                                                                                                            | 25 exp Analgesics/ (538503)                                                                                                                                                                                                                                                                                                                                                      |
| 26 analges*.mp. (197813)                                                                                                                   |                                                                                                                                                                                                                                                                                                                                                                                  |
| 27 treat*.mp. (6135100)                                                                                                                    |                                                                                                                                                                                                                                                                                                                                                                                  |
| 28 therap*.mp. (6259786)                                                                                                                   |                                                                                                                                                                                                                                                                                                                                                                                  |
| 29 intervention*.mp. (1088700)                                                                                                             |                                                                                                                                                                                                                                                                                                                                                                                  |
| 30 manag*.mp. (1565947)                                                                                                                    |                                                                                                                                                                                                                                                                                                                                                                                  |
| 31 prevent*.mp. (2435611)                                                                                                                  |                                                                                                                                                                                                                                                                                                                                                                                  |
| 32 (surgery or surgical).mp. (3112981)                                                                                                     |                                                                                                                                                                                                                                                                                                                                                                                  |



eTable 2. Continued

| DATABASE | SEARCH STRATEGY                                                                                                                                                                                                                                                                                                                          |
|----------|------------------------------------------------------------------------------------------------------------------------------------------------------------------------------------------------------------------------------------------------------------------------------------------------------------------------------------------|
|          | 33 exp Drug Therapy/ (1377452)                                                                                                                                                                                                                                                                                                           |
|          | 34 exp Therapeutics/ (4661006)                                                                                                                                                                                                                                                                                                           |
|          | 35 (antibiotic* or opioid* or steroid*).mp. [mp=title, abstract, original title, name of substance word, subject heading word, floating sub-heading word, keyword heading word, organism supplementary concept word, protocol supplementary concept word, rare disease supplementary concept word, unique identifier, synonyms] (841008) |
|          | 36 or/23-35 (14241897)                                                                                                                                                                                                                                                                                                                   |
|          | 37 22 and 36 (2158)                                                                                                                                                                                                                                                                                                                      |
|          | 38 "28858553".fc_acno. (1)                                                                                                                                                                                                                                                                                                               |
|          | 39 "27769675".fc_acno. (1)                                                                                                                                                                                                                                                                                                               |
|          | 40 "27461787".fc_acno. (1)                                                                                                                                                                                                                                                                                                               |
|          | 41 "32318443".fc_acno. (1)                                                                                                                                                                                                                                                                                                               |
|          | 42 "32065309".fc_acno. (1)                                                                                                                                                                                                                                                                                                               |
|          | 43 "29959306".fc_acno. (1)                                                                                                                                                                                                                                                                                                               |
|          | 44 or/38-43 (6)                                                                                                                                                                                                                                                                                                                          |
|          | 45 37 and 44 (6)                                                                                                                                                                                                                                                                                                                         |

**eTable 3.** Risk of bias assessment of the studies in systematic review 1 including local anesthetics.

| STUDY, YEAR                                              | RANDOMIZATION | DEVIATIONS FROM THE INTENDED INTERVENTION | MISSING OUTCOME DATA | MEASUREMENT OF OUTCOME | SELECTION OF THE REPORTED RESULTS |
|----------------------------------------------------------|---------------|-------------------------------------------|----------------------|------------------------|-----------------------------------|
| <b>Use of Rescue Analgesia</b>                           |               |                                           |                      |                        |                                   |
| Rosenquist and Colleagues, <sup>19</sup> 1988            | Probably low  | Probably low                              | Low                  | Low                    | Probably low                      |
| Hyrkas and Colleagues, <sup>15</sup> 1994                | Low           | Low                                       | Low                  | Low                    | Low                               |
| Markovic and Todorović, <sup>16</sup> 2006               | Probably low  | Low                                       | Low                  | Low                    | Low                               |
| Pellicer-Chover and Colleagues, <sup>18</sup> 2013       | Low           | Low                                       | Low                  | Low                    | Low                               |
| Brajkovic and Colleagues, <sup>13</sup> 2015             | Low           | Low                                       | High                 | Low                    | Low                               |
| Olmedo-Gaya and Colleagues, <sup>17</sup> 2018           | Low           | Low                                       | Low                  | Low                    | Probably high                     |
| Adelusi and Colleagues, <sup>11</sup> 2019               | Probably low  | Low                                       | Low                  | Low                    | Low                               |
| Tijanac and Buric, <sup>22</sup> 2019                    | Low           | Low                                       | Low                  | Low                    | Low                               |
| <b>Time to Analgesic Consumption</b>                     |               |                                           |                      |                        |                                   |
| Trieger and Gillen, <sup>23</sup> 1979A                  | Probably high | Probably high                             | Low                  | High                   | Low                               |
| Trieger and Gillen, <sup>23</sup> 1979B                  | Probably high | Probably high                             | Low                  | High                   | Low                               |
| Gregorio and Colleagues, <sup>14</sup> 2008A             | Low           | Low                                       | Low                  | Low                    | Low                               |
| Gregorio and Colleagues, <sup>14</sup> 2008B             | Low           | Low                                       | Low                  | Low                    | Low                               |
| Trullenque-Eriksson and Guisado-Moya, <sup>24</sup> 2010 | Probably high | Low                                       | High                 | Low                    | High                              |
| Pellicer-Chover and Colleagues, <sup>18</sup> 2013       | Low           | Low                                       | Low                  | Low                    | Low                               |
| Thakare and Colleagues, <sup>21</sup> 2014               | Low           | High                                      | Low                  | Probably low           | Low                               |
| Olmedo-Gaya and Colleagues, <sup>17</sup> 2017           | Low           | Low                                       | Low                  | Low                    | High                              |
| Tijanac and Buric, <sup>22</sup> 2019                    | Low           | Low                                       | Low                  | Low                    | Low                               |
| <b>Amount of Analgesic Consumption</b>                   |               |                                           |                      |                        |                                   |
| Trieger and Gillen, <sup>23</sup> 1979A                  | Probably high | Probably high                             | Low                  | High                   | High                              |
| Trieger and Gillen, <sup>23</sup> 1979B                  | Probably high | Probably high                             | Low                  | High                   | High                              |
| Bouloux and Punnia-Moorthy, <sup>12</sup> 1999           | Low           | Low                                       | Low                  | Low                    | Probably high                     |
| Markovic and Todorović, <sup>16</sup> 2006               | Probably low  | Low                                       | Low                  | Low                    | High                              |
| Gregorio and Colleagues, <sup>14</sup> 2008A             | Low           | Low                                       | Low                  | Low                    | Low                               |
| Gregorio and Colleagues, <sup>14</sup> 2008B             | Low           | Low                                       | Low                  | Low                    | Low                               |
| Sancho-Puchades and Colleagues, <sup>20</sup> 2012       | Low           | Low                                       | Probably low         | Low                    | High                              |
| Brajkovic and Colleagues, <sup>13</sup> 2015             | Low           | Low                                       | High                 | Low                    | Low                               |

eTable 3. Continued

| STUDY, YEAR                                        | RANDOMIZATION | DEVIATIONS FROM THE INTENDED INTERVENTION | MISSING OUTCOME DATA | MEASUREMENT OF OUTCOME | SELECTION OF THE REPORTED RESULTS |
|----------------------------------------------------|---------------|-------------------------------------------|----------------------|------------------------|-----------------------------------|
| Adelusi and Colleagues, <sup>11</sup> 2019         | Probably low  | Low                                       | Low                  | Low                    | Probably high                     |
| Tijanac and Buric, <sup>22</sup> 2019              | Low           | Low                                       | Low                  | Low                    | Low                               |
| <b>Any Adverse Effect</b>                          |               |                                           |                      |                        |                                   |
| Trieger and Gillen, <sup>23</sup> 1979A            | Probably high | Probably high                             | Probably low         | High                   | High                              |
| Trieger and Gillen, <sup>23</sup> 1979B            | Probably high | Probably high                             | Probably low         | High                   | High                              |
| Markovic and Todorović, <sup>16</sup> 2006         | Probably low  | Low                                       | Probably low         | Low                    | High                              |
| Sancho-Puchades and Colleagues, <sup>20</sup> 2011 | Low           | Low                                       | Probably low         | Low                    | Low                               |
| Tijanac and Buric, <sup>22</sup> 2019              | Low           | Low                                       | Low                  | Low                    | Low                               |

eTable 4. Characteristics of the studies in systematic review 2 comparing benzocaine formulations to each other and placebo.

| STUDY, YEAR                                  | STUDY DESIGN   | COUNTRY       | NUMBER OF PARTICIPANTS RANDOMIZED | AGE, Y, MEAN (SD or SE) | SEX, FEMALE, % | POPULATION                                 | INTERVENTIONS                           |
|----------------------------------------------|----------------|---------------|-----------------------------------|-------------------------|----------------|--------------------------------------------|-----------------------------------------|
| Sveen and Colleagues, <sup>29</sup> 1982     | Parallel group | United States | 49                                | 26.2 (Not reported)     | 48.98          | Pulpitis or toothache or its complications | 7.5% benzocaine, placebo                |
| Gangarosa and Colleagues, <sup>25</sup> 1989 | Parallel group | United States | 27                                | 28 (SD, 6)              | 70.37          | Pulpitis or toothache or its complications | 20% benzocaine, 10% benzocaine, placebo |
| Hersh and Colleagues <sup>27</sup> 1993      | Parallel group | United States | 20                                | 30 (SE, 2.25)           | 55             | Pulpitis or toothache or its complications | 20% benzocaine, placebo                 |
| Hersh and Colleagues, <sup>28</sup> 2005     | Parallel group | United States | 30                                | 30.25 (SD, 8.63)        | 50             | Pulpitis or toothache or its complications | 20% benzocaine, placebo                 |
| Hersh and Colleagues, <sup>26</sup> 2013     | Parallel group | United States | 576                               | 31.1 (SD, 12.7)         | 52.08          | Pulpitis or toothache or its complications | 20% benzocaine, 10% benzocaine, placebo |

**eTable 5.** Risk of bias assessment on studies in systematic review 2 including benzocaine.

| STUDY, YEAR                                  | RANDOMIZATION | DEVIATIONS FROM THE INTENDED OUTCOME | MISSING OUTCOME DATA | MEASUREMENT OF OUTCOME | SELECTION OF THE REPORTED RESULTS |
|----------------------------------------------|---------------|--------------------------------------|----------------------|------------------------|-----------------------------------|
| <b>Amount of Responders at 20 Minutes</b>    |               |                                      |                      |                        |                                   |
| Gangarosa and Colleagues, <sup>25</sup> 1989 | Low           | Low                                  | Low                  | Low                    | Low                               |
| Hersh and Colleagues, <sup>28</sup> 2005     | Low           | Low                                  | Low                  | Low                    | Low                               |
| Hersh and Colleagues, <sup>26</sup> 2013     | Probably low  | Low                                  | Low                  | Low                    | Low                               |
| <b>Any Adverse Effect</b>                    |               |                                      |                      |                        |                                   |
| Sveen and Colleagues, <sup>29</sup> 1982     | Low           | Low                                  | Low                  | Low                    | High                              |
| Gangarosa and Colleagues, <sup>25</sup> 1989 | Low           | Low                                  | Low                  | Low                    | Probably low                      |
| Hersh and Colleagues, <sup>27</sup> 1993     | Probably low  | Low                                  | Low                  | Low                    | Probably low                      |
| Hersh and Colleagues, <sup>28</sup> 2005     | Low           | Low                                  | Low                  | Low                    | Probably low                      |
| Hersh and Colleagues, <sup>26</sup> 2013     | Probably low  | Low                                  | Low                  | Low                    | Low                               |

**eTable 6.** 10% benzocaine vs 20% benzocaine for pulpitis and toothache.

| OUTCOME                                                                                                                                  | FOLLOW-UP, MIN | PARTICIPANTS (RANDOMIZED CONTROLLED TRIALS), NO. | RELATIVE EFFECT* (95% CI)       | ANTICIPATED ABSOLUTE EFFECTS, % (95% CI) |                     |                     | CERTAINTY             | WHAT HAPPENS                                                                                                                                  |
|------------------------------------------------------------------------------------------------------------------------------------------|----------------|--------------------------------------------------|---------------------------------|------------------------------------------|---------------------|---------------------|-----------------------|-----------------------------------------------------------------------------------------------------------------------------------------------|
|                                                                                                                                          |                |                                                  |                                 | With 20% Benzocaine                      | With 10% Benzocaine | Difference          |                       |                                                                                                                                               |
| <b>Amount of Responders Assessed With Proportion of Participants Who Had a Reduced Pain Intensity Score at 2 Consecutive Time Points</b> | 20-30          | 479 (2)                                          | Risk ratio, 0.93 (0.86 to 1.00) | 86.9                                     | 80.8 (74.8 to 86.9) | -6.1 (-12.2 to 0.0) | Moderate <sup>†</sup> | There is probably a negligible benefit of 20% benzocaine compared with 10% benzocaine with regard to the amount of responders from 20-30 min. |
| <b>Any Adverse Effect Assessed With Proportion of Participants Experiencing Any Adverse Effect<sup>‡</sup></b>                           | 90-120         | 479 (2)                                          | Not estimable                   | 2.5                                      | 2.5                 | 0.0 (-3.0 to 3.0)   | Low <sup>‡,§</sup>    | There may be no difference between 10% and 20% benzocaine with regard to incidence of adverse effects.                                        |

\* The risk in the intervention group (and its 95% CI) is based on the assumed risk in the comparison group and the relative effect of the intervention (and its 95% CI).

† Using a threshold of 8.69% (based on 10% of the risk with 20% benzocaine), the lower bound of the 95% CI indicates an important effect favoring 20% benzocaine, whereas the upper bound suggests that there is no difference between these interventions. Therefore, the authors rated down 1 level owing to imprecision. ‡ All reported incidents of adverse effects were categorized as mild adverse effects (not specified). § Using a threshold of 0.25% (based on 10% of the risk with 20% benzocaine), the lower bound of the 95% CI suggests an important benefit of 10% benzocaine, whereas the upper bound suggests an important benefit of 20% benzocaine. Therefore, the authors rated down 2 levels owing to imprecision.

**eTable 7.** 10% benzocaine vs placebo for pulpitis and toothache.

| OUTCOME                                                                                                                                            | FOLLOW-UP, MIN | PARTICIPANTS (RANDOMIZED CONTROLLED TRIALS), NO. | RELATIVE EFFECT* (95% CI)       | ANTICIPATED ABSOLUTE EFFECTS (95% CI) |                     |                       | CERTAINTY          | WHAT HAPPENS                                                                                                                                         |
|----------------------------------------------------------------------------------------------------------------------------------------------------|----------------|--------------------------------------------------|---------------------------------|---------------------------------------|---------------------|-----------------------|--------------------|------------------------------------------------------------------------------------------------------------------------------------------------------|
|                                                                                                                                                    |                |                                                  |                                 | Placebo                               | With 10% Benzocaine | Difference            |                    |                                                                                                                                                      |
| <b>Amount of Responders Assessed With Proportion of Participants Who Had a Reduced Pain Intensity Score for at Least 2 Consecutive Time Points</b> | 20-30          | 366 (2)                                          | Risk ratio, 1.38 (0.74 to 2.56) | 67.7                                  | 93.5 (50.1 to 100)  | 25.7 (-17.6 to 105.7) | Low <sup>†,‡</sup> | 10% benzocaine may increase the amount of responders at 20 to 30 min when compared with no treatment (placebo) by an important amount.               |
| <b>Adverse Effects Assessed With Proportion of Participants Experiencing Any Adverse Effect<sup>§</sup></b>                                        | 10-120         | 415 (3)                                          | Not estimable                   | 2.7                                   | 2.3                 | -1.0 (-4.0 to 3.0)    | Low <sup>¶</sup>   | There may be an important difference favoring 10% benzocaine when compared with no treatment (placebo) with regards to incidence of adverse effects. |

\* The risk in the intervention group (and its 95% CI) is based on the assumed risk in the comparison group and the relative effect of the intervention (and its 95% CI).

† There is moderate statistical heterogeneity ( $I^2 = 50\%$ ,  $P = .16$ ). However, the CIs of the effect estimates overlap, so the authors did not rate down for inconsistency.

‡ Using a threshold of 6.77% (based on 10% of the baseline risk, that is, the risk with no treatment [placebo]), the lower bound of the 95% CI suggests an important benefit of no treatment (placebo), whereas the upper bound suggests an important benefit of 10% benzocaine. Therefore, the authors rated down 2 levels owing to imprecision.

§ All reported incidents of adverse effects were categorized as mild or moderate adverse effects (not specified). ¶ Using a threshold of 0.27% (based on 10% of the baseline risk, that is, the risk with no treatment [placebo]), the lower bound of the 95% CI suggests an important benefit of 10% benzocaine, whereas the upper bound suggests an important benefit of no treatment (placebo). Therefore, the authors rated down 2 levels owing to imprecision.

**eTable 8.** 20% benzocaine vs placebo for pulpitis and toothache.

| OUTCOME                                                                                                                                            | FOLLOW-UP, MIN | PARTICIPANTS (RANDOMIZED CONTROLLED TRIALS), NO. | RELATIVE EFFECT* (95% CI)       | ANTICIPATED ABSOLUTE EFFECTS (95% CI) |                     |                    | CERTAINTY          | WHAT HAPPENS                                                                                                                           |
|----------------------------------------------------------------------------------------------------------------------------------------------------|----------------|--------------------------------------------------|---------------------------------|---------------------------------------|---------------------|--------------------|--------------------|----------------------------------------------------------------------------------------------------------------------------------------|
|                                                                                                                                                    |                |                                                  |                                 | Placebo                               | With 20% Benzocaine | Difference         |                    |                                                                                                                                        |
| <b>Amount of Responders Assessed With Proportion of Participants Who Had a Reduced Pain Intensity Score for at Least 2 Consecutive Time Points</b> | 20-30          | 391 (3)                                          | Risk ratio, 1.47 (1.03 to 2.10) | 65.5                                  | 96.2 (67.4 to 100)  | 30.8 (2.0 to 72.0) | Low <sup>†,‡</sup> | 20% benzocaine may increase the amount of responders at 20 to 30 min when compared with no treatment (placebo) by an important amount. |
| <b>Adverse Effects Assessed With Proportion of Participants Experiencing any Adverse Effect<sup>§</sup></b>                                        | 10-120         | 411 (4)                                          | Not estimable                   | 2.7                                   | 2.3                 | -1.0 (-4.0 to 3.0) | Low <sup>¶</sup>   | There may be an important difference favoring 20% benzocaine over no treatment (placebo) with regards to incidence of adverse effects. |

\* The risk in the intervention group (and its 95% CI) is based on the assumed risk in the comparison group and the relative effect of the intervention (and its 95% CI).

† There is moderate statistical heterogeneity ( $I^2 = 41\%$ ,  $P = .18$ ). However, the 95% CIs of the effect estimates overlap, so the authors did not rate down for inconsistency. ‡ Using a threshold of 6.55% (based on 10% of the baseline risk, that is, the risk with no treatment [placebo]), the lower bound of the 95% CI suggests a negligible benefit of 20% benzocaine, whereas the upper bound suggests an important benefit of 20% benzocaine. Therefore, the authors rated down 2 levels owing to imprecision. § All reported incidents of adverse effects were categorized as mild or moderate adverse effects (not specified). ¶ Using a threshold of 0.27% (based on 10% of the baseline risk, that is, the risk with no treatment [placebo]), the lower bound of the 95% CI suggests an important benefit of 20% benzocaine, whereas the upper bound suggests an important benefit of no treatment (placebo). Therefore, the authors rated down 2 levels owing to imprecision.
